# Supplementary material
Source: PubMed Central journal article supplement (PMC2827819)

## **Listing of Supplemental Digital Content**

Supplemental Digital Content 1.

Figure: Comparison of 1-year lagged outcomes by subsyndromal depression group (TIFF file)

Type of file: figure

Label:

Filename: Grabovich paper Figure CMYK.tiff

# Comparison of 1-year Lagged Outcomes by Subsyndromal Depression Group

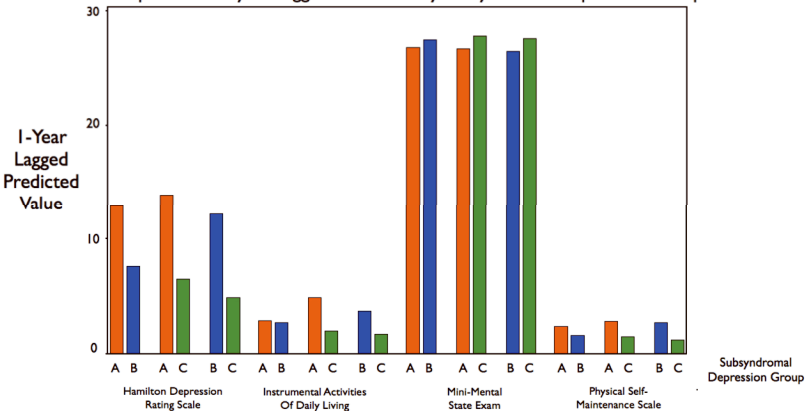

Supplement: NIHMS172882-supplement-supplement_1.pdf [file NIHMS172882-supplement-supplement_1.pdf]
